# Supplementary material for: Targeting the Highly Expressed microRNA miR-146b with CRISPR/Cas9n Gene Editing System in Thyroid Cancer
Source: MDPI journal article supplement (doi:10.3390/ijms22157992), 2021-07-26
Supplement: s1 [file s1]

# Targeting the Highly Expressed microRNA miR-146b with CRISPR/Cas9n Gene Editing System in Thyroid Cancer

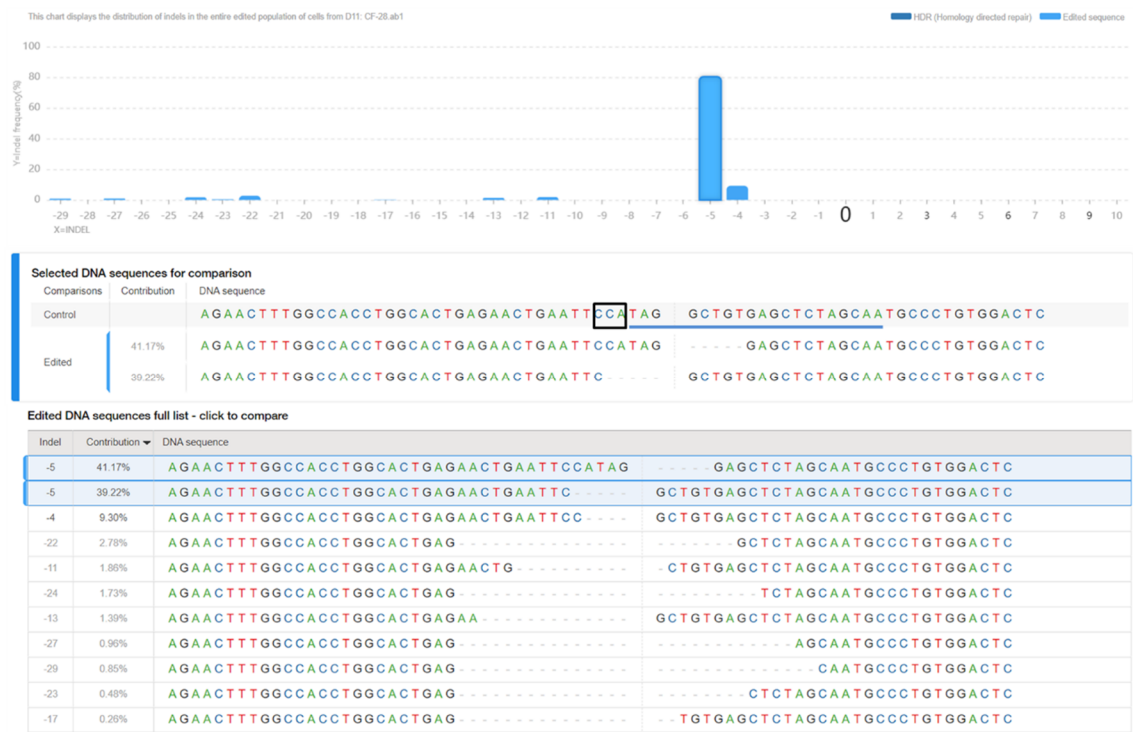

**Figure S1.** Validation of *MIR146B* gene editing for GuideA-targeted region in KTC2-Cl1 using the SeqScreener Gene App. Black square indicates the PAM sequence adjacent to the sgRNA underlined in blue.

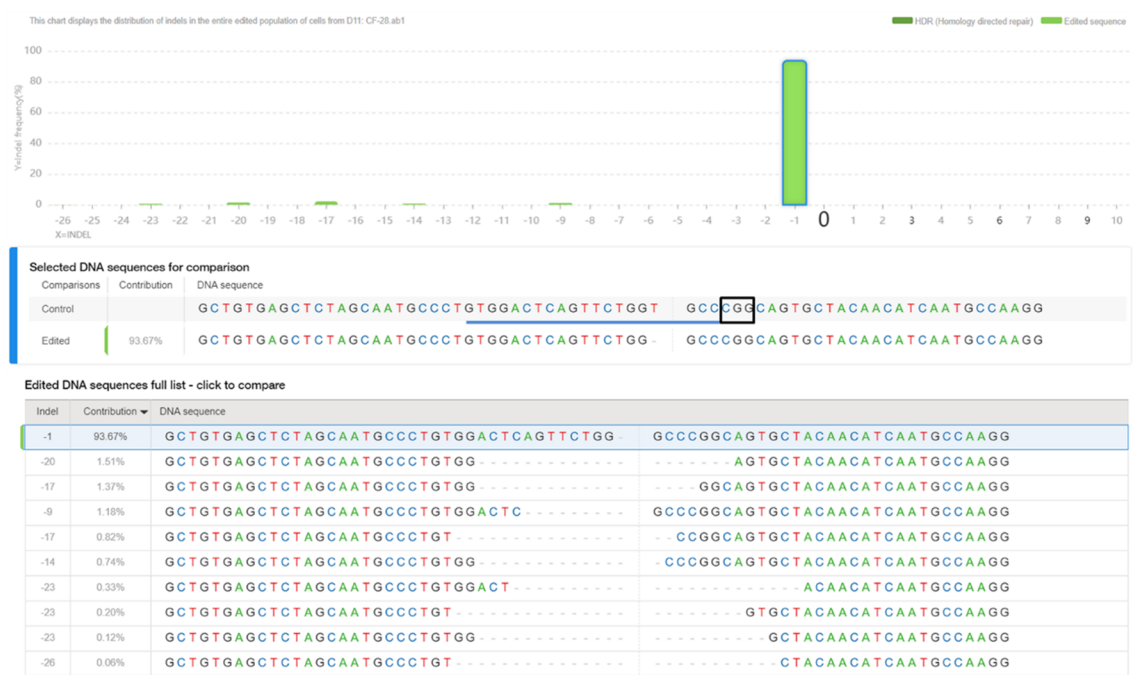

**Figure S2.** Validation of *MIR146B* gene editing for GuideB-targeted region in KTC2-Cl1 using the SeqScreener Gene App. Black square indicates the PAM sequence adjacent to the sgRNA underlined in blue.

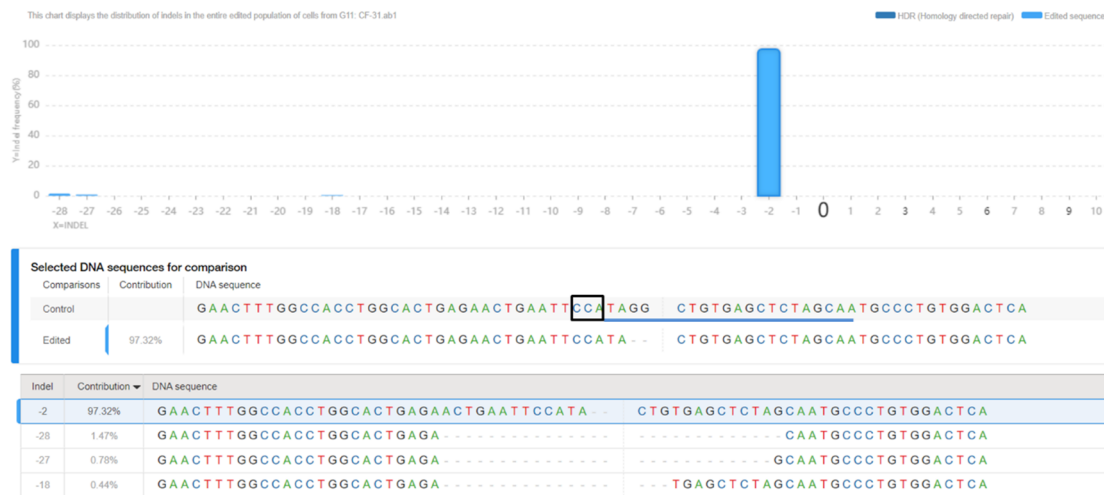

**Figure S3.** Validation of *MIR146B* gene editing for GuideA-targeted region in KTC2-CI3 using the SeqScreener Gene App. Black square indicates the PAM sequence adjacent to the sgRNA underlined in blue.

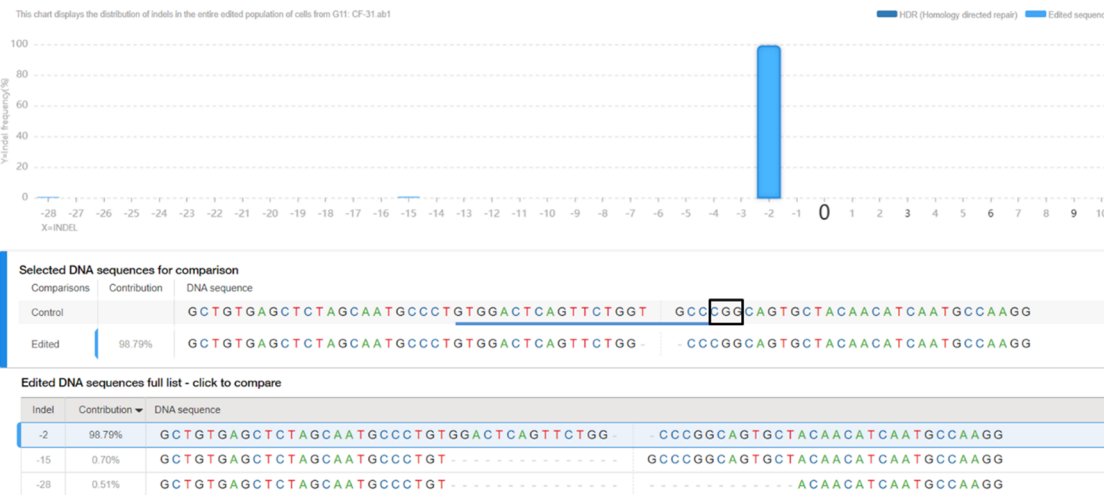

**Figure S4.** Validation of *MIR146B* gene editing for GuideB-targeted region in KTC2-CI3 using the SeqScreener Gene App. Black square indicates the PAM sequence adjacent to the sgRNA underlined in blue.

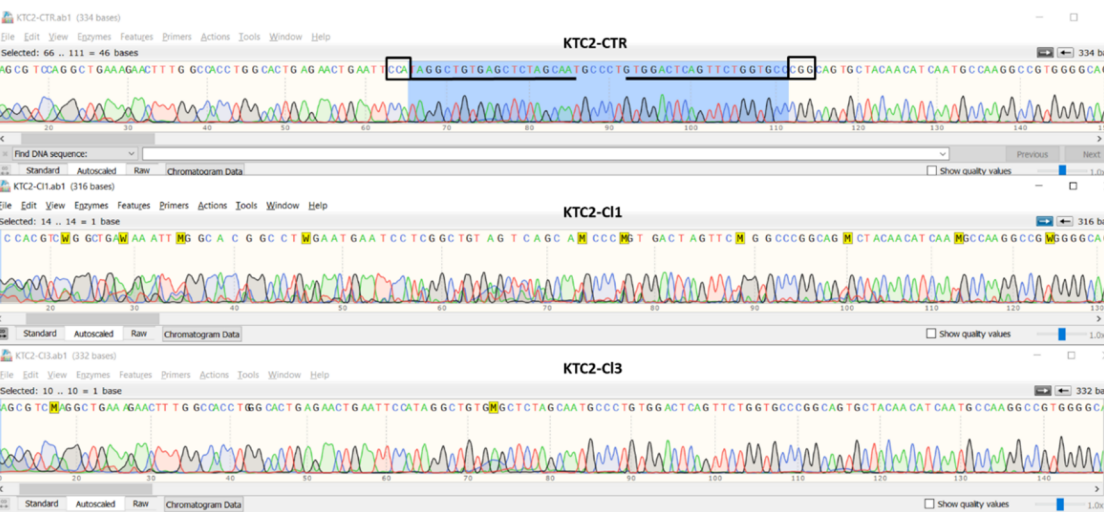

**Figure S5.** Raw sanger sequencing data alignment for *MIR146B* gene used in SeqScreener Gene Editing. The blue highlighted region in KTC2-CTR indicates the region between two sgRNAs that are underlined in black. PAM sequences are indicated by black squares.

**Table S1.** Off-targets list of sgRNA A and sgRNA B.

| sgRNA   | Location                                       | Number of Mismatches | Sequence (Including Mismatches) |
|---------|------------------------------------------------|----------------------|---------------------------------|
| sgRNA A | chr10:102436533 ( <i>MIR146B</i> ) - on target | 0                    | TTGCTAGAGCTCACAGCCTATGG         |
|         | chr10:95817873                                 | 3                    | TTGCTgtAGCTCAgAGCCTAGGG         |
|         | chr12:106688991                                | 3                    | TTcCTAGAGCTCACAGtCTcAGG         |
|         | chr13:58239277                                 | 3                    | gTGCTAGAGCTtcCAGCCTAGGG         |
|         | chr14:98114838                                 | 3                    | CCCTAtcCTGTGAGCTCTAGtAA         |
|         | chr16:24336061                                 | 3                    | CCCTAGGCccTGAGCTCTtGCAA         |
|         | chr16:65410481                                 | 3                    | CCCTAGGCTGTGAaCTCTAcCAG         |
|         | chr2:221546073                                 | 3                    | CCTTAGaCTGTGAaCTCTtGCAA         |
|         | chr21:19900603                                 | 3                    | cTGCTAGAGCTtcCAGCCTAAGG         |
|         | chr5:142679117                                 | 3                    | TTtCTAGgGCTCACAGctTAAGG         |
|         | chr6:122057654                                 | 2                    | TTGCTAGAGCTctCAGaCTAAGG         |
|         | chr7:101906218                                 | 3                    | TTGCTgGAGtTCACAGCCcATGG         |
|         | chrX:139912958                                 | 3                    | TTGCTAGgGCTctCAGCCTtAGG         |
| sgRNA B | chr10:102436562 ( <i>MIR146B</i> ) - on target | 0                    | GTGGACTCAGTTCTGGTGCCCGG         |
|         | chr1:22182587                                  | 3                    | GTGGcCTCAGTTCTGtTcCCTGG         |
|         | chr1:112028553                                 | 3                    | GgGGA CTCA GTgCTGGTGctAGG       |
|         | chr1:191533406                                 | 3                    | CCAGGctCCAGAACTGccTCCAC         |
|         | chr13:40338408                                 | 3                    | CCGGGCACCAGAACTagGgCCAC         |
|         | chr14:36482672                                 | 3                    | CCAGGatCCAGAACTGAGTCCAt         |
|         | chr14:85131510                                 | 3                    | GTGGACTCAGTTaTaaTGCCAGG         |
|         | chr14:102644835                                | 2                    | tTGGtCTCAGTTCTGGTGcCTGG         |
|         | chr15:30264840                                 | 3                    | GTaGACTCAGTgCTGtTGCCGGG         |
|         | chr15:32273795                                 | 3                    | CCCGGCAaCAGcACTGAGTctAC         |
|         | chr15_KI270905v1_alt:2549795                   | 3                    | GTaGACTCAGTgCTGtTGCCGGG         |
|         | chr15_KI270905v1_alt:4559480                   | 3                    | CCCGGCAaCAGcACTGAGTctAC         |
|         | chr18:23820083                                 | 3                    | CCTGtCcCCAGAACTGAtTCCAC         |
|         | chr19:22351022                                 | 3                    | CCTGGggCCAGAgCTGAGTCCAC         |
|         | chr2:127624083                                 | 3                    | cTGGcCTCAGTTCTGGTcCCTGG         |
|         | chr2:231859595                                 | 3                    | CCAGGCACCAGAgCTGAagCCAC         |
|         | chr21:45459366                                 | 3                    | CCGGGCACCAGAAcAGAGcCctC         |
|         | chr4:2836889                                   | 3                    | GTGGgGCTCAGTTCTGGgGctTGG        |
|         | chr8:144181727                                 | 3                    | GTGGACTCAGcTaaGGTGCCTGG         |
